# Supplementary material for: Salvia officinalis L.: Antitrypanosomal Activity and Active Constituents against Trypanosoma brucei rhodesiense
Source: MDPI journal article supplement (doi:10.3390/molecules26113226), 2021-05-27
Supplement: s1 [file s1]

*Supplementary Material*

# ***Salvia officinalis*: Antitrypanosomal Activity and Active Constituents against *Trypanosoma brucei rhodesiense*.**

**Núria Llorba Montesino <sup>1</sup>, Marcel Kaiser <sup>2,3</sup>, Pascal Mäser <sup>2,3</sup> and Thomas J. Schmidt <sup>1,\*</sup>**

<sup>1</sup> Institute of Pharmaceutical Biology and Phytochemistry (IPBP), University of Münster, PharmaCampus, Corrensstr. 48, D-48149 Münster, Germany; dagmar.flittner@web.de (D.F.)

<sup>2</sup> Swiss Tropical and Public Health Institute (Swiss TPH), Socinstrasse 57, CH-4051 Basel, Switzerland; marcel.kaiser@unibas.ch (M.K.); pascal.maeser@swisstph.ch (P.M.)

<sup>3</sup> University of Basel, Petersplatz 1, CH-4003 Basel, Switzerland

\* Correspondence: thomschm@uni-muenster.de; Tel.: +49-251-83-33378 (T.J.S.)

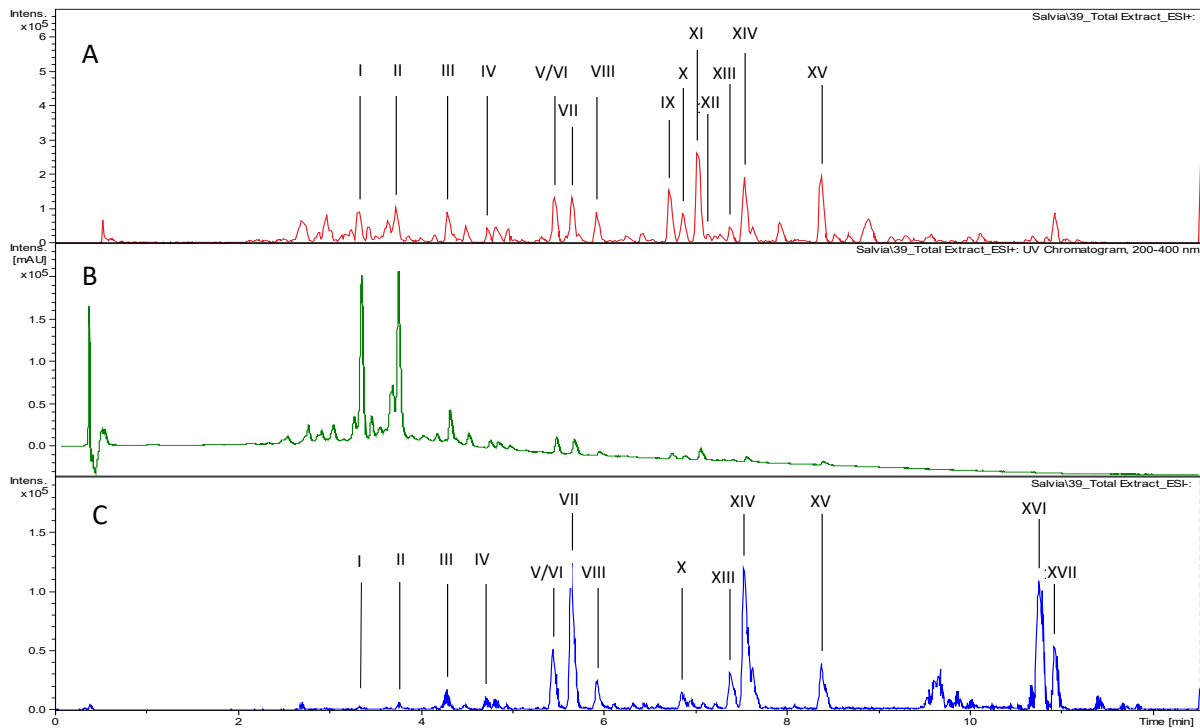

**Figure S1.** UHPLC/+ESI QqTOF MSMS analysis of the investigated Sage tincture. A: +ESI base peak ion chromatogram (m/z 100–1000). B: UV Chromatogram 200–400 nm. C: -ESI base peak ion chromatogram (m/z 100–1000).

**Table S1.** Peaks detected in Sage tincture (compare Figure S1) by UHPLC/ESI QqTOF MSMS and results of their dereplication.

| Peak | tR   | Ion<br>[M+H] <sup>+</sup> | Ion<br>[M-H] <sup>-</sup> | Main<br>Fragment(s)<br>(ESI <sup>+</sup> ) | UV ● <sub>max</sub> | Suggested<br>compound        |
|------|------|---------------------------|---------------------------|--------------------------------------------|---------------------|------------------------------|
| I    | 3.3  | 463.0897                  | 461.4708                  | 287.0566                                   | 204, 272, 336       | luteolin-7-glucuronide       |
| II   | 3.7  | 361.0900                  | 359.4232                  | 163.0386                                   | 288, 328            | rosmarinic acid              |
| III  | 4.3  | 287.0573                  | 285.3410                  | n.d.                                       | 236, 289, 325       | luteolin                     |
| IV   | 4.7  | 271.0610                  | 269.3371                  | n.d.                                       | 240, 286, 325       | apigenin                     |
| V    | 5.5  | 315.0864                  | 313.3915                  | n.d.                                       | 240, 281, 333       | cirsimartin                  |
| VI   | 5.6  | 347.1838                  | 345.5095                  | 301.1802                                   | n.d.                | rosmanol or isomer           |
| VII  | 5.7  | 347.1847                  | 345.5111                  | 301.1801/<br>329.1745                      | 240, 286, 332       | rosmanol or isomer           |
| VIII | 5.9  | 347.1879                  | 345.5095                  | 301.1971/<br>329.1742                      | 244, 288, 326       | rosmanol or isomer           |
| IX   | 6.7  | 329.1018                  | n.d.                      | n.d.                                       | 244, 283, 328       | salvigenin                   |
| X    | 6.9  | 361.2003                  | 343.4937                  | 329.1746/<br>301.1785                      | 244, 290            | 7-O-methylrosmanol or isomer |
| XI   | 7.0  | 361.2010                  | n.d.                      | 329.1748/<br>301.1790                      | 244, 288            | 7-O-methylrosmanol or isomer |
| XII  | 7.1  | 331.1898                  | n.d.                      | 285.1836                                   | 248                 | carosol                      |
| XIII | 7.4  | 375.2183                  | 373.5550                  | 329.1763/<br>301.1798                      | 248, 290, 322       | 7-O-ethylrosmanol or isomer  |
| XIV  | 7.5  | 375.2163                  | 373.5568                  | 329.1760/<br>301.1808                      | 248, 288, 325       | 7-O-ethylrosmanol or isomer  |
| XV   | 8.4  | 347.2005                  | 345.5459                  | 301.2163                                   |                     | 12-O-methyl-carosic acid     |
| XVI  | 10.8 | n.d.                      | 535.8133                  | n.d.                                       | n.d.                | n.i.                         |
| XVII | 10.9 | n.d.                      | 549.8360                  | n.d.                                       | n.d.                | n.i.                         |

Abbreviations: tR, retention time; n.d., not detected; n.i., not identified.

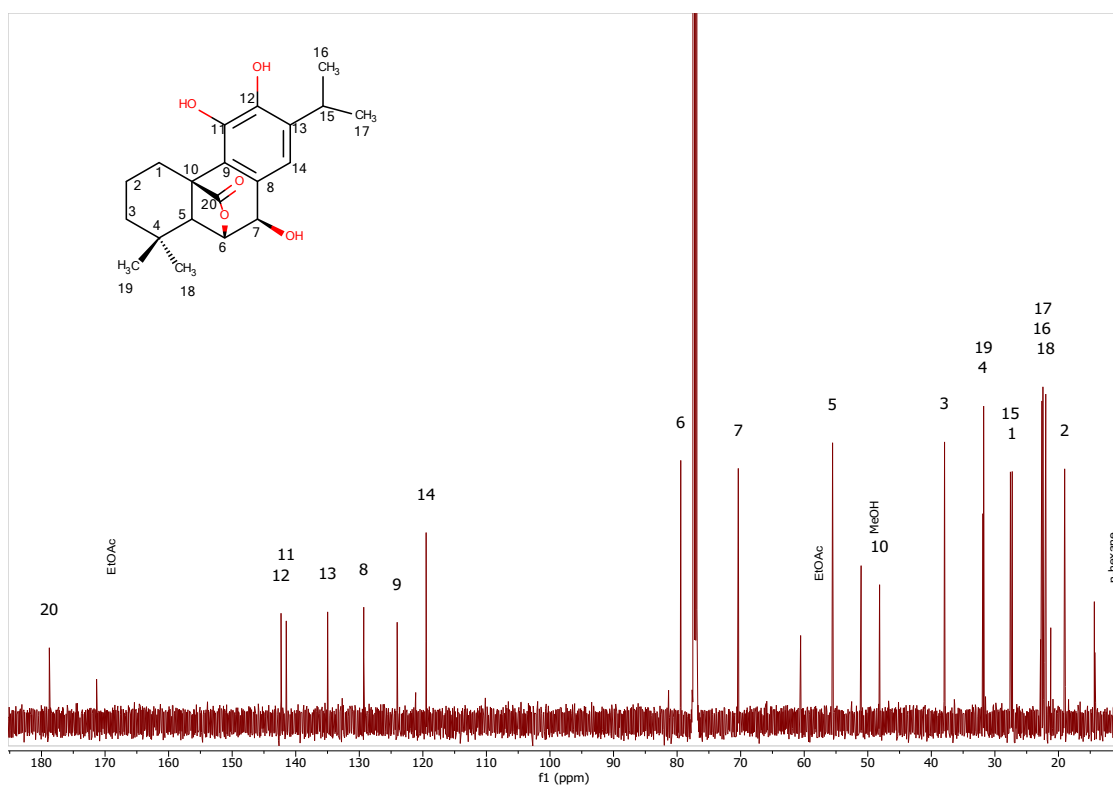

**Figure S2.**  $^{13}\text{C}$  NMR spectrum of compound **2** (150 MHz,  $\text{CDCl}_3$ ).

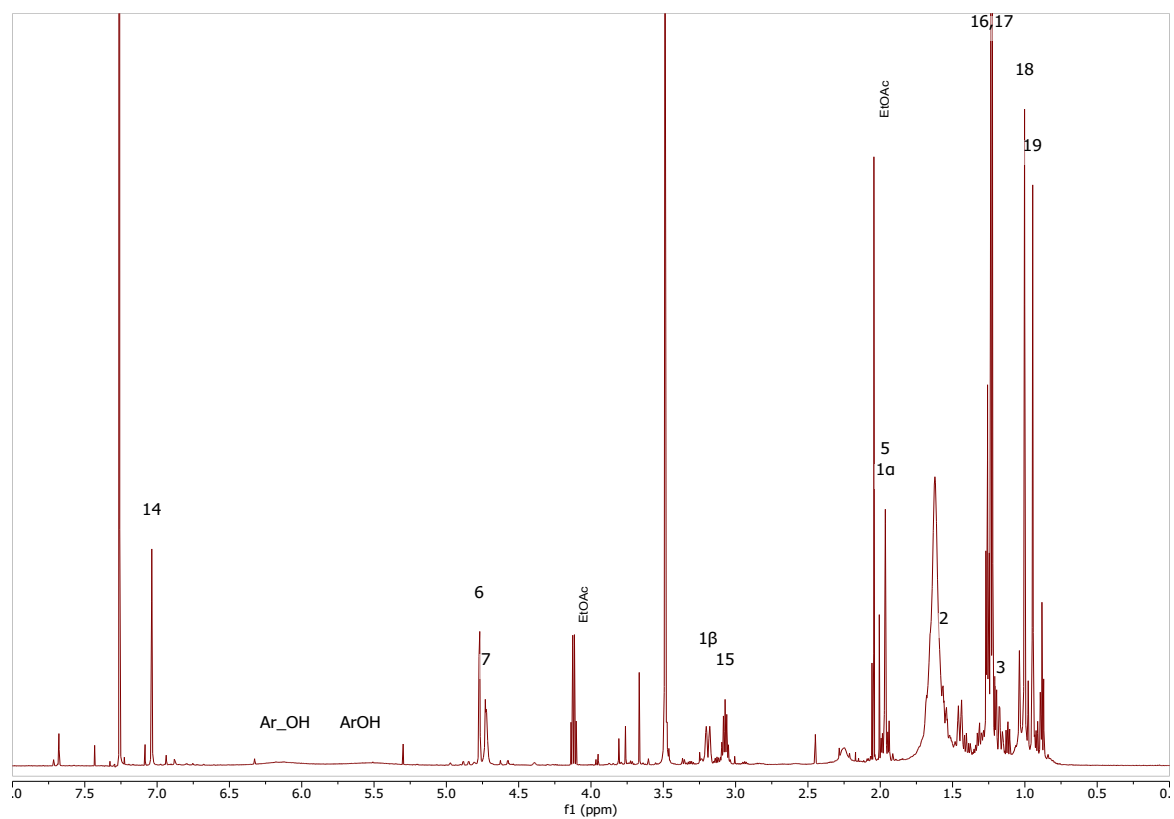

**Figure S3.**  $^1\text{H}$  NMR spectrum of compound **2** (600 MHz,  $\text{CDCl}_3$ ).

**Table S2.** <sup>1</sup>H- and <sup>13</sup>C-NMR data (CDCl<sub>3</sub>, 600 and 150 MHz, respectively) of compound **2** compared with literature [6].

|            | <i>Epirosmanol (2)</i>                        |                                                                |                          |
|------------|-----------------------------------------------|----------------------------------------------------------------|--------------------------|
|            | $\delta$ <sup>1</sup> H <i>mult</i> (J in Hz) | $\delta$ <sup>1</sup> H <i>mult</i> (J in Hz) [6] <sup>a</sup> | $\delta$ <sup>13</sup> C |
| 1 $\alpha$ | 1.96 <i>dt</i> (14.2/ 5.5)                    | -                                                              | 27.27                    |
| 1 $\beta$  | 3.19 <i>br d</i> (14.2)                       | 3.19 <i>br d</i> ( <i>n.d</i> )                                |                          |
| 2 $\alpha$ | 1.67 <i>m</i>                                 | -                                                              | 19.03                    |
| 2 $\beta$  | 1.55 <i>dt</i> (13.9/ 3.6)                    | -                                                              |                          |
| 3 $\alpha$ | 1.17 <i>dd</i> (13.5/ 3.3)                    | -                                                              | 37.92                    |
| 3 $\beta$  | 1.45 <i>dt</i> (13.5/3.3)                     | -                                                              |                          |
| 4          | -                                             | -                                                              | 31.89                    |
| 5          | 1.96 <i>s</i>                                 | 1.97 <i>s</i>                                                  | 55.54                    |
| 6          | 4.78 <i>d</i> (3.2)                           | 4.77 <i>overlapping signals</i>                                | 79.43                    |
| 7          | 4.73 <i>br d</i> (3.6)                        | -                                                              | 70.37                    |
| 8          | -                                             | -                                                              | 129.30                   |
| 9          | -                                             | -                                                              | 124.04                   |
| 10         | -                                             | -                                                              | 48.14                    |
| 11         | -                                             | -                                                              | 141.49                   |
| 12         | -                                             | -                                                              | 142.31                   |
| 13         | -                                             | -                                                              | 134.98                   |
| 14         | 7.04 <i>s</i>                                 | 7.04 <i>s</i>                                                  | 119.48                   |
| 15         | 3.07 <i>sept</i> (6.8)                        | 3.08 <i>sept</i> (7.0)                                         | 27.56                    |
| Me-16      | 1.23 <i>d</i> (6.7)                           | 1.23 <i>d</i> (7)                                              | 22.60                    |
| Me-17      | 1.24 <i>d</i> (6.7)                           | -                                                              | 22.45                    |
| Me-18      | 1.00 <i>s</i>                                 | 1.00 <i>s</i>                                                  | 21.93                    |
| Me-19      | 0.95 <i>s</i>                                 | 0.95 <i>s</i>                                                  | 31.77                    |
| 20         | -                                             | -                                                              | 178.77                   |
| Ar-OH      | 5.50 <i>br s</i>                              | 5.50 <i>br s</i>                                               | -                        |
| Ar-OH      | 6.12 <i>br s</i>                              | 6.18 <i>br s</i>                                               | -                        |

<sup>a</sup>(300 MHz CDCl<sub>3</sub>).

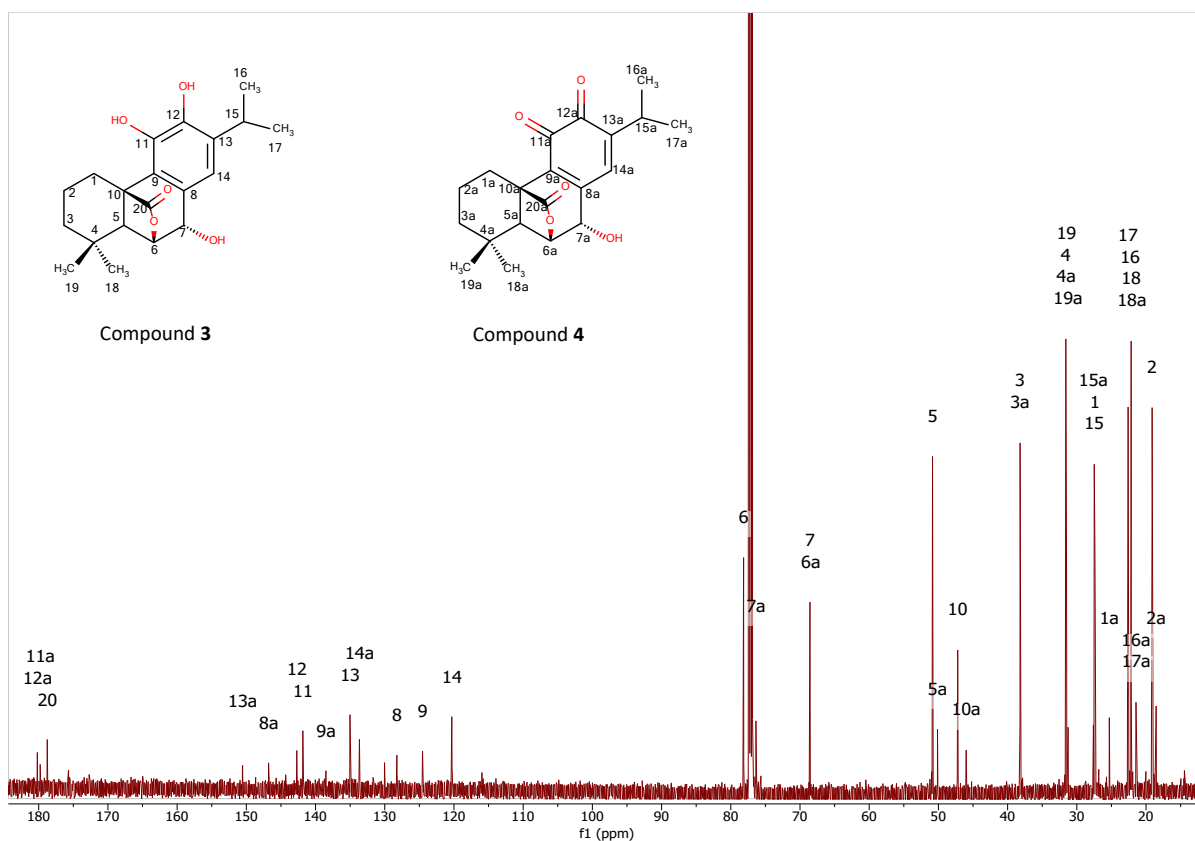

**Figure S4.** <sup>13</sup>C NMR spectrum of compounds 3+4 (150 MHz, CDCl<sub>3</sub>).

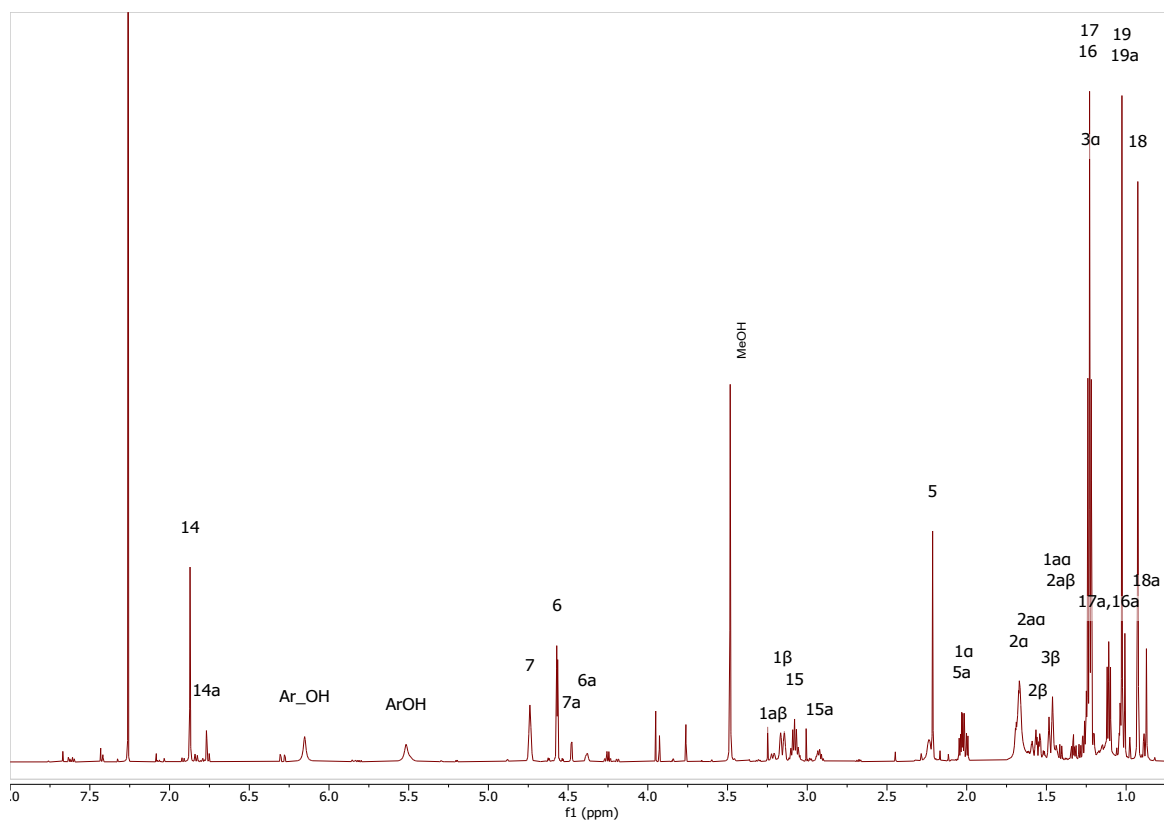

**Figure S5.** <sup>1</sup>H NMR spectrum of compounds 3+4 (600 MHz, CDCl<sub>3</sub>).

**Table S3.** <sup>1</sup>H-NMR and <sup>13</sup>C-NMR data (CDCl<sub>3</sub>, 600 and 150 MHz, respectively) of compounds **3** and **4** compared with literature [6, 7].

|            | <i>Rosmanol (3)*</i>                   |                                        |                          | <i>Rosmaquinone (4)</i>                |                                                         |                          |                                       |
|------------|----------------------------------------|----------------------------------------|--------------------------|----------------------------------------|---------------------------------------------------------|--------------------------|---------------------------------------|
|            | $\delta$ <sup>1</sup> H mult (J in Hz) | $\delta$ <sup>1</sup> H mult (J in Hz) | $\delta$ <sup>13</sup> C | $\delta$ <sup>1</sup> H mult (J in Hz) | $\delta$ <sup>1</sup> H mult (J in Hz) [7] <sup>b</sup> | $\delta$ <sup>13</sup> C | $\delta$ <sup>13</sup> C <sup>b</sup> |
| 1 $\alpha$ | 2.01 <i>dt</i> (14.2/5.3)              | 2.00 <i>dt</i>                         | 27.47                    | 1.44                                   | 1.45                                                    | 25.4                     | 25.0                                  |
| 1 $\beta$  | 3.20 <i>br d</i> (14.3)                | 3.21 <i>br d</i>                       |                          | 3.21 <i>br d</i>                       | 3.21 <i>br d</i> (10.5)                                 |                          |                                       |
| 2 $\alpha$ | 1.66 <i>m</i>                          | -                                      | 19.20                    | 1.59                                   | 1.60 <i>m</i>                                           | 18.6                     | 18.2                                  |
| 2 $\beta$  | 1.54 <i>dt</i> (13.7/)                 | -                                      |                          | 1.46                                   | 1.45                                                    |                          |                                       |
| 3 $\alpha$ | 1.22 <i>d</i> (5.7)                    | -                                      | 38.32                    | n.d.                                   | 1.22 <i>m</i>                                           | 38.4                     | 37.8                                  |
| 3 $\beta$  | 1.47 <i>dt</i> (13.4/)                 | -                                      |                          | n.d.                                   | 1.45                                                    |                          |                                       |
| 4          | -                                      | -                                      | 31.53                    | -                                      | -                                                       | 31.2                     | 31.2                                  |
| 5          | 2.22 <i>s</i>                          | 2.21 <i>s</i>                          | 50.83                    | 2.03s                                  | 2.05 <i>s</i>                                           | 50.75                    | 49.8                                  |
| 6          | 4.56 <i>d</i> (3.4)                    | 4.57 <i>d</i> (3.3)                    | 78.16                    | 4.38 <i>br s</i>                       | 4.52 <i>d</i> (3.5)                                     | 76.41                    | 76.1                                  |
| 7          | 4.73 <i>d</i> (3.4)                    | 4.74 <i>d</i> (3.3)                    | 68.62                    | 4.48 <i>d</i> (3.1)                    | 4.40 <i>d</i> (3.5)                                     | 68.49                    | 68.0                                  |
| 8          | -                                      | -                                      | 128.30                   | -                                      | -                                                       | 146.8                    | 146.7                                 |
| 9          | -                                      | -                                      | 124.48                   | -                                      | -                                                       | 138.51                   | 138.1                                 |
| 10         | -                                      | -                                      | 47.25                    | -                                      | -                                                       | 46.02                    | 45.7                                  |
| 11         | -                                      | -                                      | 142.43                   | -                                      | -                                                       | 179.79                   | 179.5                                 |
| 12         | -                                      | -                                      | 142.71                   | -                                      | -                                                       | 180.2                    | 179.9                                 |
| 13         | -                                      | -                                      | 135.61                   | -                                      | -                                                       | 150.55                   | 150.1                                 |
| 14         | 6.86 <i>s</i>                          | 6.87 <i>s</i>                          | 120.11                   | 6.77 <i>s</i>                          | 6.79 <i>s</i>                                           | 133.67                   | 133.5                                 |
| 15         | 3.12 <i>sept</i> (6.9)                 | 3.20 <i>sept</i> (7.0)                 | 27.38                    | 2.92                                   | 2.93 <i>hept</i> (7)                                    | 27.65                    | 27.3                                  |
| Me-16      | 1.21 <i>d</i> (6.6)                    | 1.22 <i>d</i> (7.0)                    | 22.40                    | 1.11                                   | 1.06 <i>d</i> (7)                                       | 21.5                     | 21.1                                  |
| Me-17      | 1.20 <i>d</i> (6.6)                    | 1.23 <i>d</i> (7.0)                    | 22.72                    | 1.11                                   | 1.08 <i>d</i> (7)                                       | 21.46                    | 21.1                                  |
| Me-18      | 1.03 <i>s</i>                          | 1.03 <i>s</i>                          | 31.64                    | 1.01 <i>s</i>                          | 1.02 <i>s</i>                                           | 31.3                     | 30.9                                  |
| Me-19      | 0.93 <i>s</i>                          | 0.93 <i>s</i>                          | 22.22                    | 0.87 <i>s</i>                          | 0.88 <i>s</i>                                           | 22.05                    | 21.7                                  |
| 20         | -                                      | -                                      | 178.78                   | -                                      | -                                                       | -                        | -                                     |
| Ar-OH      | 6.15 <i>br s</i>                       | -                                      | -                        | -                                      | -                                                       | -                        | -                                     |
| ArOH       | 5.51 <i>br s</i>                       | -                                      | -                        | -                                      | -                                                       | -                        | -                                     |

\* Compound **3** was present as the major component of a mixture (4:1) with its oxidized o-quinoid form, rosmaquinone **4**.

<sup>a</sup> (300 MHz CDCl<sub>3</sub>)

<sup>b</sup> (<sup>1</sup>H-NMR; 300 MHz CDCl<sub>3</sub>, <sup>13</sup>C-NMR; 75 MHz CDCl<sub>3</sub>)

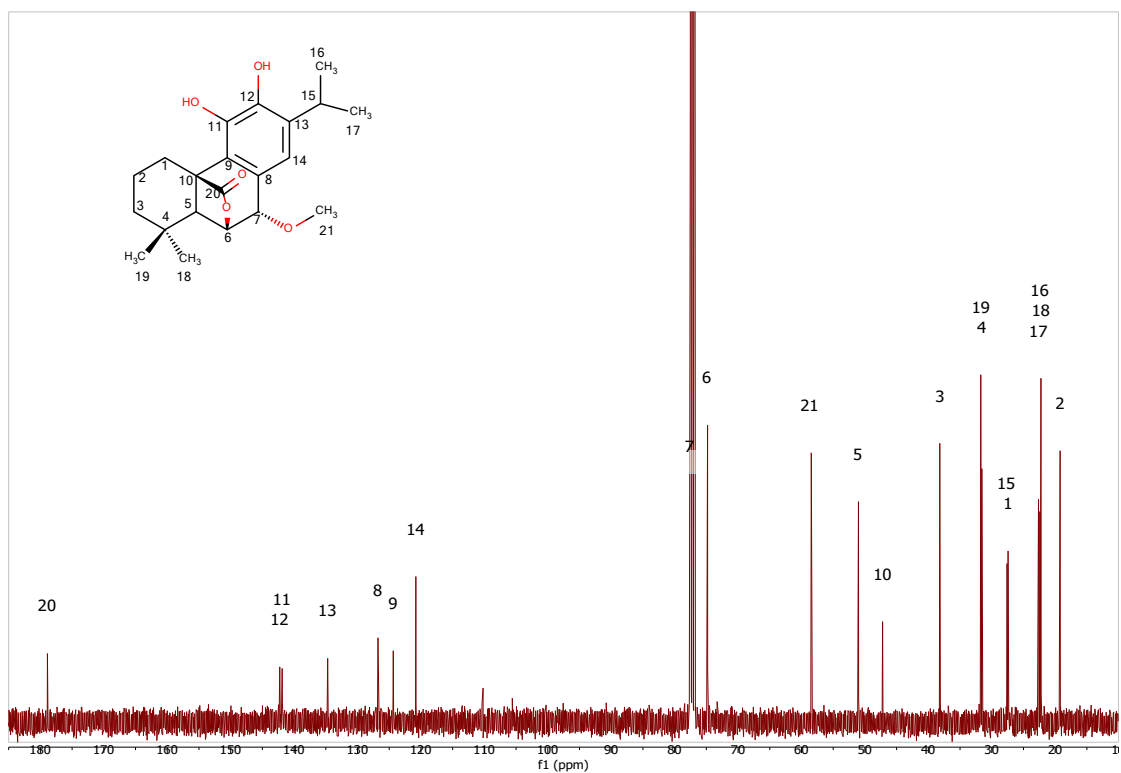

**Figure S6.** <sup>13</sup>C NMR spectrum of compound **5** (150 MHz, CDCl<sub>3</sub>).

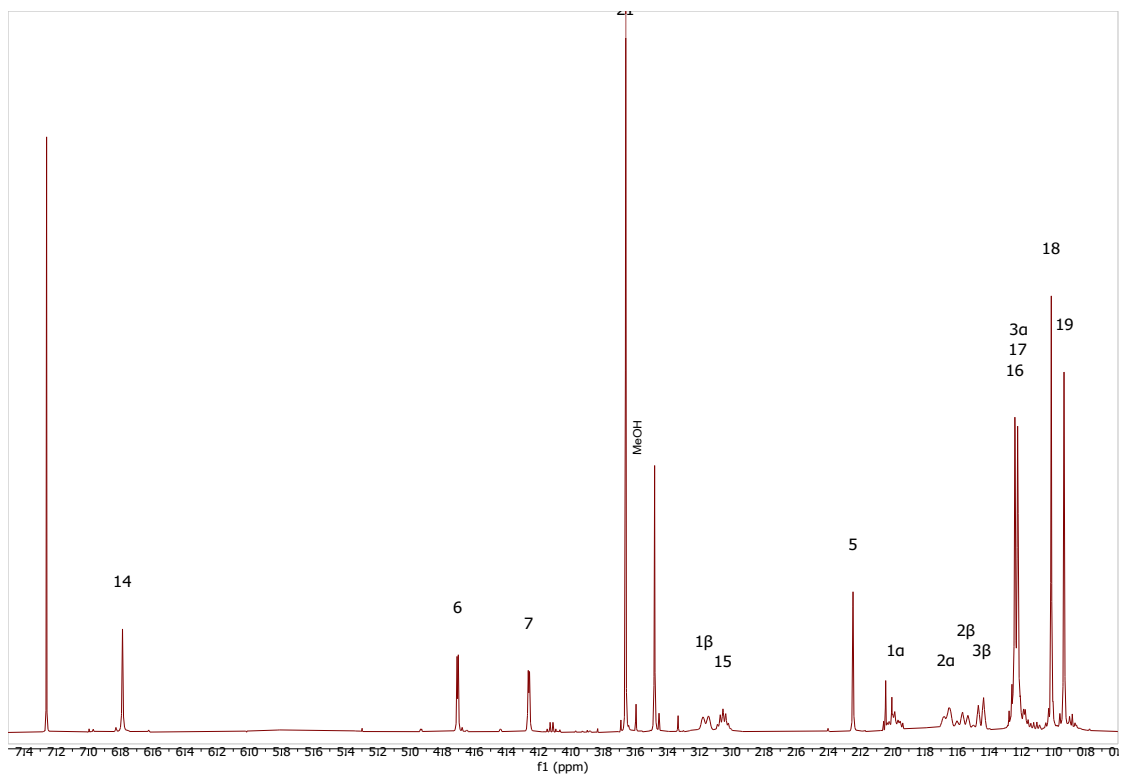

**Figure S7.** <sup>1</sup>H NMR spectrum of compound **5** (600 MHz, CDCl<sub>3</sub>).



**Table S4.** <sup>1</sup>H-NMR and <sup>13</sup>C-NMR data (CDCl<sub>3</sub>, 600 and 150 MHz, respectively) of compound **5** compared with literature [9].

|                      | 7-O-methylrosmanol ( <b>5</b> )        |                                                            |                   |                                       |
|----------------------|----------------------------------------|------------------------------------------------------------|-------------------|---------------------------------------|
|                      | δ <sup>1</sup> H <i>mult</i> (J in Hz) | δ <sup>1</sup> H <i>mult</i> (J in Hz)<br>[9] <sup>a</sup> | δ <sup>13</sup> C | δ <sup>13</sup> C<br>[9] <sup>a</sup> |
| 1 α                  | 1.99 <i>td</i> (13.8/5.4)              | 1.96 <i>td</i> (13.8/ 4.8)                                 | 27.37             | 27.3                                  |
| 1 β                  | 3.16 <i>br d</i> (13.8)                | 3.26 <i>d</i> (13.8)                                       |                   |                                       |
| 2α                   | 1.66 <i>dd</i> (13.5/3.9)              | 1.47 <i>br q</i> (13.8)                                    | 19.17             | 18.9                                  |
| 2β                   | 1.54 <i>br dt</i> (13.5/3.9)           | 1.59-1.68 <i>m</i>                                         |                   |                                       |
| 3α                   | 1.22 <i>m</i>                          | 1.22 <i>m</i>                                              | 38.09             | 38.0                                  |
| 3β                   | 1.45 <i>dt</i> (13.2/ 3.4)             | 1.44 <i>br d</i> (13.2)                                    |                   |                                       |
| 4                    | -                                      | -                                                          | 31.52             | 31.5                                  |
| 5                    | 2.25 <i>s</i>                          | 2.23 <i>s</i>                                              | 51.07             | 50.9                                  |
| 6                    | 4.70 <i>d</i> (3.10)                   | 4.70 <i>d</i> (3)                                          | 74.89             | 77.5                                  |
| 7 β                  | 4.26 <i>d</i> (3.1)                    | 4.25 <i>d</i> (3)                                          | 77.66             | 74.7                                  |
| 8                    | -                                      | -                                                          | 126.36            | 126.5                                 |
| 9                    | -                                      | -                                                          | 124.34            | 124.1                                 |
| 10                   | -                                      | -                                                          | 47.17             | 47.0                                  |
| 11                   | -                                      | -                                                          | 141.86            | 142.4                                 |
| 12                   | -                                      | -                                                          | 142.22            | 141.9                                 |
| 13                   | -                                      | -                                                          | 134.69            | 134.9                                 |
| 14                   | 6.78 <i>s</i>                          | 6.77 <i>s</i>                                              | 120.78            | 120                                   |
| 15                   | 3.05 <i>sept</i> (6.9)                 | 3.05 <i>sept</i> (7.2)                                     | 27.66             | 27.1                                  |
| 16                   | 1.24 <i>d</i> (6.9)                    | 1.18 <i>d</i> (6.6)                                        | 22.37             | 22.4                                  |
| 17                   | 1.22 <i>d</i> (6.8)                    | 1.18 <i>d</i> (6.6)                                        | 22.58             | 22.1                                  |
| Me-18                | 1.01 <i>s</i>                          | 1.00 <i>s</i>                                              | 31.65             | 31.3                                  |
| Me-19                | 0.93 <i>s</i>                          | 0.90 <i>s</i>                                              | 22.19             | 21.9                                  |
| 20                   | -                                      | -                                                          | 178.89            | 179.2                                 |
| 21 O-CH <sub>3</sub> | 3.66 <i>s</i>                          | 3.65 <i>s</i>                                              | 58.65             | 58.3                                  |
| Ar-OH                | n.d.                                   | 6.00 <i>s</i>                                              | -                 | -                                     |
| Ar-OH                | n.d.                                   | 6.00 <i>s</i>                                              | -                 | -                                     |

<sup>a</sup><sup>1</sup>H-NMR; 600 MHz CDCl<sub>3</sub>; <sup>13</sup>C-NMR: 150MHz CDCl<sub>3</sub>)

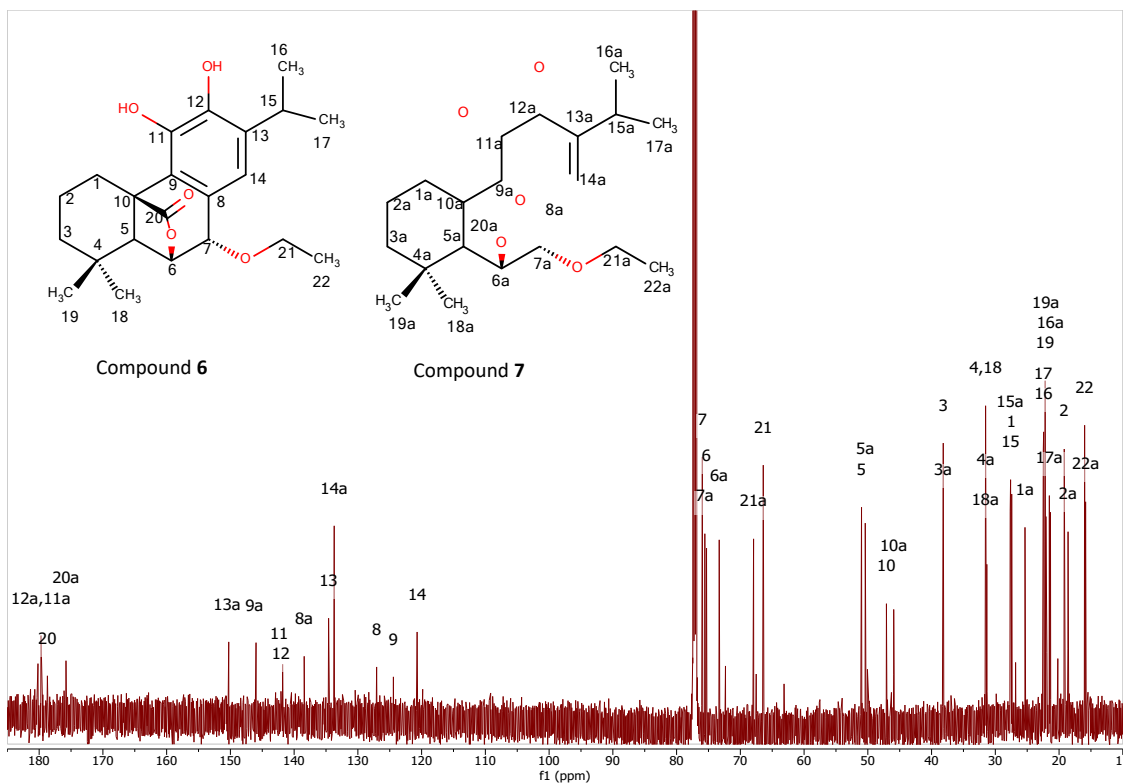

**Figure S8.**  $^{13}\text{C}$  NMR spectrum of compounds **6** + **7** (150 MHz,  $\text{CDCl}_3$ ).

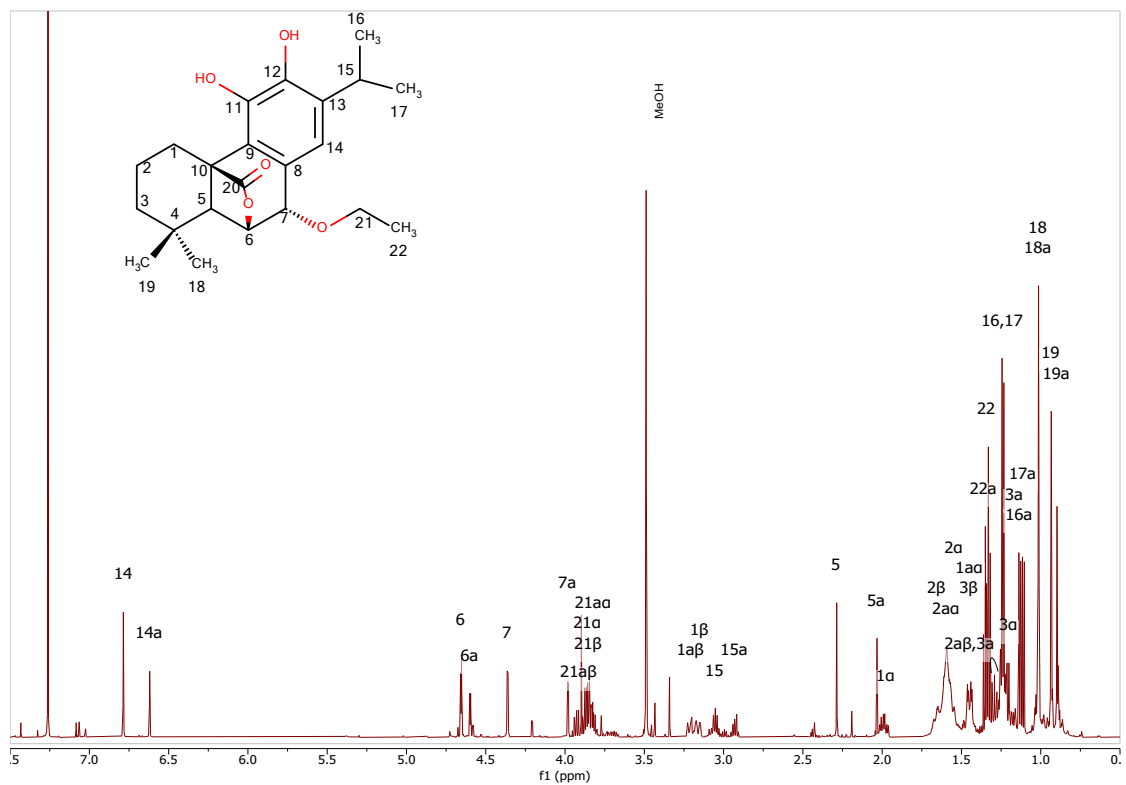

**Figure S9.**  $^1\text{H}$  NMR spectrum of compounds **6** + **7** (600 MHz,  $\text{CDCl}_3$ ).

**Table S5.** <sup>1</sup>H-NMR and <sup>13</sup>C-NMR data (CDCl<sub>3</sub>, 600 and 150 MHz, respectively) of compound **4** (major compound) and compound **5** (minor compound) (mixture 6:4:1 7-O-ethylrosmanol, 7-O-ethylrosmaquinone: non identified compound). Data of **4** are compared with literature [11], those of **5** are reported for the first time.

|                      | 7-O-ethylrosmanol ( <b>4</b> )         |                                                         |                   | 7-O-ethylrosmaquinone ( <b>5</b> )  |                                        |                   |
|----------------------|----------------------------------------|---------------------------------------------------------|-------------------|-------------------------------------|----------------------------------------|-------------------|
|                      | δ <sup>1</sup> H <i>mult</i> (J in Hz) | δ <sup>1</sup> H <i>mult</i> (J in Hz)[11] <sup>a</sup> | δ <sup>13</sup> C | δ <sup>13</sup> C [11] <sup>a</sup> | δ <sup>1</sup> H <i>mult</i> (J in Hz) | δ <sup>13</sup> C |
| 1α                   | 1.99 <i>dt</i> (14.1/5.8)              | 1.99 <i>dd</i> (5.1/13.8)                               | 27.43             | 27.2                                | 1.45 <i>dd</i>                         |                   |
| 1β                   | 3.16 <i>br d</i> (14.2)                | 3.19 <i>br d</i> (13.8)                                 |                   |                                     | 3.21 <i>br d</i>                       | 25.34             |
| 2α                   | 1.55 <i>dt</i> (14.5/3.7)              | 1.54 <i>dt</i> (3.2/13.4)                               | 19.19             | 19.0                                | 1.59 <i>indef</i>                      |                   |
| 2β                   | 1.66 <i>m</i>                          | 1.69 <i>br d</i> (13.4)                                 |                   |                                     | 1.46                                   | 18.59             |
| 3α                   | 1.21 <i>d</i> (6.9)                    | 1.19 <i>m</i>                                           | 38.17             | 38.0                                | 1.21 (6.7)                             |                   |
| 3β                   | 1.45 <i>m</i>                          | 1.45 <i>br d</i> (13)                                   |                   |                                     | 1.45                                   | 38.2              |
| 4                    | -                                      | -                                                       | 31.53             | 31.4                                | -                                      | 31.53             |
| 5                    | 2.29 <i>s</i>                          | 2.29 <i>s</i>                                           | 50.99             | 50.9                                | 2.03 <i>s</i>                          | 50.40             |
| 6                    | 4.66 <i>d</i> (3.2)                    | 4.68 <i>d</i> (3.1)                                     | 75.31             | 75.3                                | 4.60 <i>d</i> (3.1)                    | 73.32             |
| 7                    | 4.36 <i>d</i> (3.2)                    | 4.36 <i>d</i> (3.1)                                     | 75.97             | 75.8                                | 3.98 <i>d</i> (3.1)                    | 75.57             |
| 8                    | -                                      | -                                                       | 127.11            | 126.9                               | -                                      | 138.42            |
| 9                    | -                                      | -                                                       | 124.44            | 124.2                               | -                                      | 145.98            |
| 10                   | -                                      | -                                                       | 47.08             | 47.0                                | -                                      | 45.94             |
| 11                   | -                                      | -                                                       | 141.80            | 142.0                               | -                                      | 179.71            |
| 12                   | -                                      | -                                                       | 142.09            | 142.0                               | -                                      | 180.19            |
| 13                   | -                                      | -                                                       | 134.6             | 134.9                               | -                                      | 150.26            |
| 14                   | 6.79 <i>s</i>                          | 6.77 <i>s</i>                                           | 120.5             | 120.5                               | 6.62 <i>d</i> (1.2)                    | 133.71            |
| 15                   | 3.05 <i>sept</i> (7.1)                 | 3.07 <i>sept</i> (6.7)                                  | 27.61             | 27.3                                | 2.93 <i>h</i> (1.2/7)                  | 27.67             |
| 16                   | 1.24 <i>d</i> (6.9)                    | 1.21 <i>d</i> (6.7)                                     | 22.42             | 22.2                                | 1.13 <i>d</i> (6.9)                    | 21.35             |
| 17                   | 1.24 <i>d</i> (6.9)                    | 1.23 <i>d</i> (6.7)                                     | 22.49             | 22.4                                | 1.11 <i>d</i> (6.9)                    | 21.51             |
| Me-18                | 1.01 <i>s</i>                          | 1.02 <i>s</i>                                           | 31.50             | 31.4                                | 1.01 <i>s</i>                          | 31.57             |
| Me-19                | 0.93 <i>s</i>                          | 0.94 <i>s</i>                                           | 22.18             | 22.0                                | 0.90 <i>s</i>                          | 22.06             |
| 20                   | -                                      | -                                                       | 178.71            | 179.0                               | 1.13 <i>d</i>                          | 175.79            |
| 21 O-CH <sub>2</sub> | -                                      | -                                                       | 66.41             | 66.2                                | 3.82 <i>m</i>                          | 67.93             |
| 21 O-CH <sub>2</sub> | 3.86 <i>dd</i>                         | 3.85 <i>q</i> (7.0)                                     | 66.41             | 66.2                                | 3.92 <i>ddd</i> 9.9/7.4/ 2.8)          | 67.93             |
| Me-22                | 1.34 <i>t</i> (6.8)                    | 1.35 <i>t</i> (7)                                       | 15.99             | 15.8                                | 1.36 <i>t</i> (7.05)                   | 15.84             |
| Ar-OH                | n.d.                                   | 6.06 <i>br s</i>                                        | -                 | -                                   | -                                      | -                 |
| Ar-OH                | n.d.                                   | 5.68 <i>br s</i>                                        | -                 | -                                   | -                                      | -                 |

<sup>a</sup> <sup>1</sup>H-NMR; 400 MHz CDCl<sub>3</sub>; <sup>13</sup>C-NMR 100MHz CDCl<sub>3</sub>

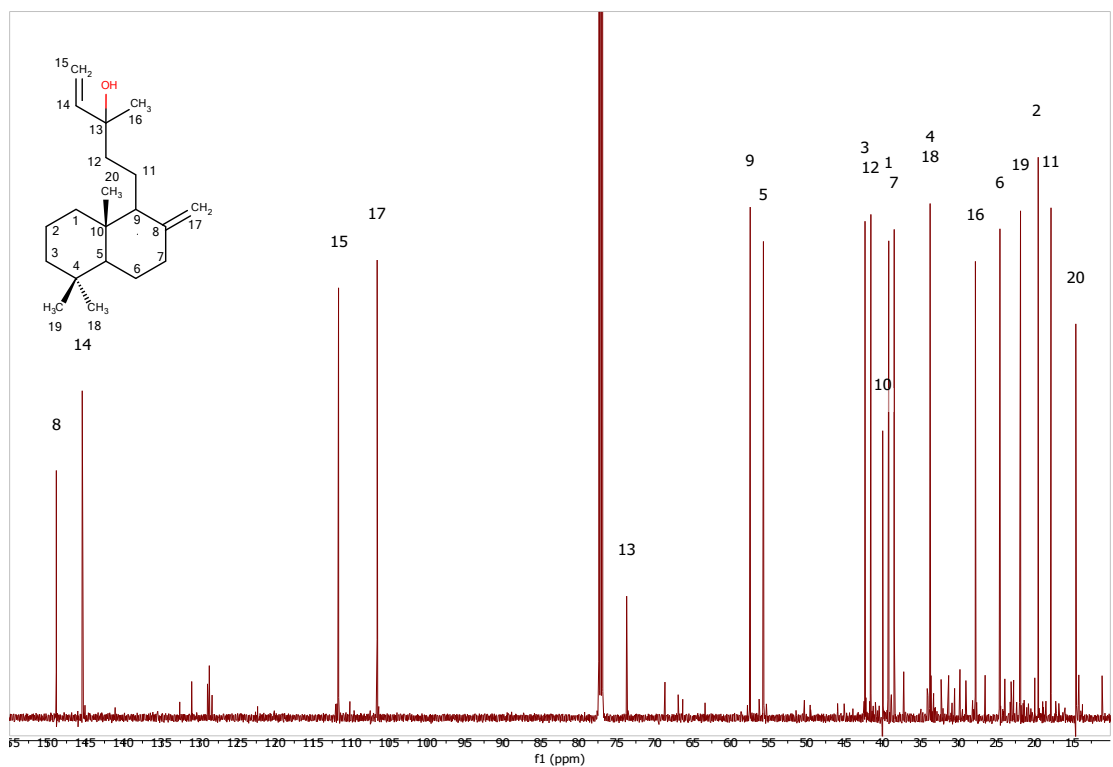

**Figure S10.** <sup>13</sup>C NMR spectrum of compound **9** (150 MHz, CDCl<sub>3</sub>).

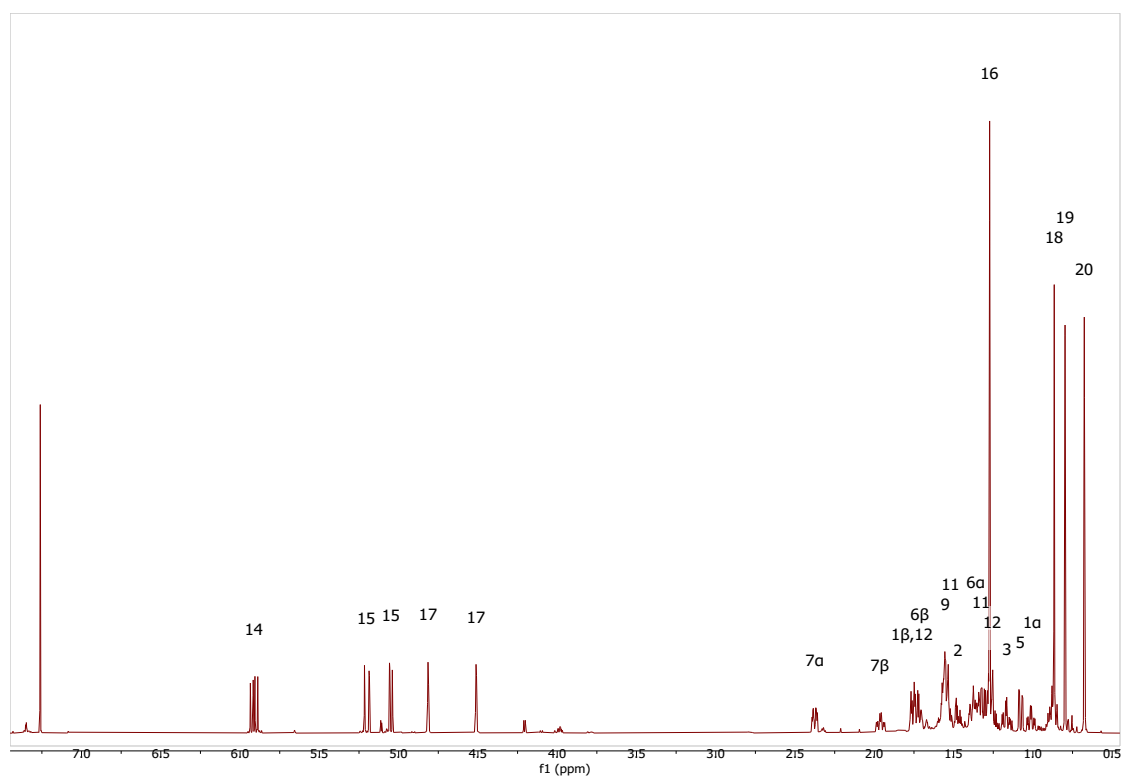

**Figure S11.** <sup>1</sup>H NMR spectrum of compound **9** (600 MHz, CDCl<sub>3</sub>).

**Table S6.** <sup>1</sup>H- and <sup>13</sup>C-NMR data (CDCl<sub>3</sub>, 600 and 150 MHz, respectively) of compound **9** compared with literature [15, 16].

| <i>Manool (9)</i> |                                               |                                                                    |                          |                                               |
|-------------------|-----------------------------------------------|--------------------------------------------------------------------|--------------------------|-----------------------------------------------|
|                   | $\delta$ <sup>1</sup> H <i>mult</i> (J in Hz) | $\delta$ <sup>1</sup> H <i>mult</i> (J in Hz)<br>[16] <sup>a</sup> | $\delta$ <sup>13</sup> C | $\delta$ <sup>13</sup> C<br>[15] <sup>b</sup> |
| 1 $\alpha$        | 1.01 <i>td</i> (13.2/4.2)                     |                                                                    | 39.23                    | 39.0                                          |
| 1 $\beta$         | 1.75 <i>m</i>                                 |                                                                    |                          |                                               |
| 2 $\alpha$        | 1.56 <i>m</i>                                 |                                                                    | 19.55                    | 19.0                                          |
| 2 $\beta$         | 1.47 <i>dt</i> (13.9/3.6)                     |                                                                    |                          |                                               |
| 3 $\alpha$        | 1.38 <i>m</i>                                 |                                                                    | 42.36                    | 42.1                                          |
| 3 $\beta$         | 1.17 <i>td</i> (13.5/4.0)                     |                                                                    |                          |                                               |
| 4                 | -                                             |                                                                    | 33.73                    | 33.5                                          |
| 5                 | 1.07 <i>dd</i> (12.6/2.8)                     |                                                                    | 55.73                    | 55.5                                          |
| 6 $\alpha$        | 1.31 <i>dd</i> (4.5/13.2)                     |                                                                    | 24.57                    | 24.4                                          |
| 6 $\beta$         | 1.70 <i>m</i>                                 |                                                                    |                          |                                               |
| 7 $\alpha$        | 2.37 <i>dq</i>                                |                                                                    | 38.50                    | 38.3                                          |
| 7 $\beta$         | 1.97 <i>td</i> (12.9/5.2)                     |                                                                    |                          |                                               |
| 8                 | -                                             |                                                                    | 148.85                   | 148.4                                         |
| 9                 | 1.54 <i>m</i>                                 |                                                                    | 57.47                    | 57.2                                          |
| 10                | -                                             |                                                                    | 40.06                    | 39.8                                          |
| 11                | 1.53 <i>m</i>                                 |                                                                    | 17.86                    | 17.6                                          |
|                   | 1.35 <i>m</i>                                 |                                                                    |                          |                                               |
| 12                | 1.25 <i>q</i> (4.6/1.7)                       |                                                                    | 41.58                    | 41.3                                          |
|                   | 1.74 <i>dd</i> (1.4/4.2)                      |                                                                    |                          |                                               |
| 13                | -                                             |                                                                    | 73.78                    | 73.4                                          |
| 14                | 5.91 <i>dd</i> (17.4/10.8)                    | 5.92 <i>dd</i> (11/ 17.5)                                          | 145.47                   | 144.9                                         |
| 15                | 5.05 <i>dd</i> (10.8/1.2)                     | 5.05 <i>n.d.</i> (2, 11)                                           | 111.68                   | 111.4                                         |
|                   | 5.20 <i>dd</i> (17.4/1.3)                     | 5.21 <i>dd</i> ( 2, 17.5)                                          |                          |                                               |
| Me- 16            | 1.27 <i>s</i>                                 | 1.26 <i>s</i>                                                      | 27.82                    | 27.9                                          |
| 17                | 4.81 <i>q</i> (3.2/1.6)                       | 4.8 <i>br s</i>                                                    | 106.57                   | 106.2                                         |
|                   | 4.51 <i>d</i> (3.12/1.4)                      | 4.47 <i>br s</i>                                                   |                          |                                               |
| Me-18             | 0.86 <i>s</i>                                 | 0.87 <i>s</i>                                                      | 33.78                    | 33.5                                          |
| Me-19             | 0.79 <i>s</i>                                 | 0.78 <i>s</i>                                                      | 21.87                    | 21.7                                          |
| Me- 20            | 0.67 <i>s</i>                                 | 0.6 <i>s</i>                                                       | 14.58                    | 14.4                                          |

<sup>a</sup> 200 MHz CDCl<sub>3</sub>; <sup>b</sup>300 MHz CDCl<sub>3</sub>
